# Supplementary material for: Conductive sol–gel films
Source: Royal Society of Chemistry journal article supplement (doi:10.1039/c3tc32462a), 2014-01-01

## Conductive sol-gel films

Vladimir V. Vinogradov,<sup>a,b</sup> Alexander Agafonov<sup>b</sup> and David Avnir<sup>a</sup>

<sup>a</sup> *Institute of Chemistry and the Center for Nanoscience and Nanotechnology, the Hebrew University of Jerusalem, Jerusalem 91904, Israel. E-mail: david.avnir@mail.huji.ac.il*

<sup>b</sup> *Institute of Solution Chemistry, Russian Academy of Sciences, Akademicheskaya 1, Ivanovo 153045, Russia. E-mail: vvv@isc-ras.ru*

### Electronic Supplementary Information

#### Additional characterization data

AFM images of AgNW@ZrO<sub>2</sub> films supported on silicon wafer (left) and PET (right), exhibit the same morphology. Similar observations have been made with other sol – gel matrixes.

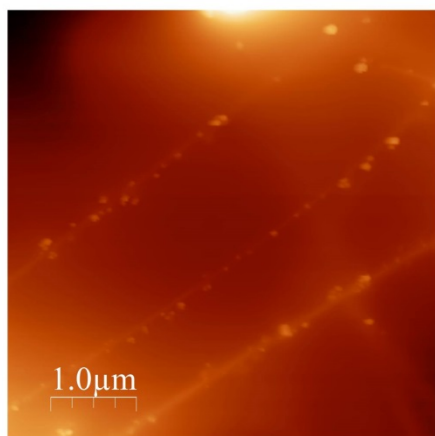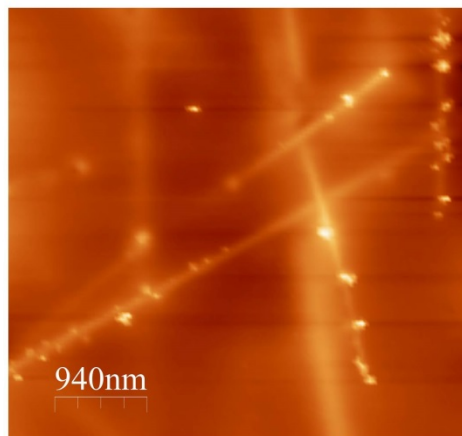

Supplement: c3tc32462a1.pdf [file c3tc32462a1.pdf]
